# Supplementary material for: A Comprehensive Benchmark of Kernel Methods to Extract Protein–Protein Interactions from Literature
Source: PubMed Central journal article supplement (PMC2895635; doi:10.1371/journal.pcbi.1000837), 2010-07-01
Supplement: pcbi.1000837.s001.pdf [file pcbi.1000837.s001.pdf]

**Table S1.** Overview of the evaluated kernels

| Kernel                        | Reference | Abbreviation | Information source  | Features                                                                                                                                                               |
|-------------------------------|-----------|--------------|---------------------|------------------------------------------------------------------------------------------------------------------------------------------------------------------------|
| shallow linguistic            | [23]      | SL           | lexical, shallow    | fore-between, between and between-after tokens relative to the entity pair; POS, lemma, orthographic features of tokens in the $w$ size window of the entities         |
| subtree                       | [30]      | ST           | syntax              | subtrees of the syntax tree (see Figure 1)                                                                                                                             |
| subset tree                   | [20]      | SST          | syntax              | subset trees of the syntax tree (see Figure 1)                                                                                                                         |
| partial tree                  | [28]      | PT           | syntax              | partial trees of the syntax tree (see Figure 1)                                                                                                                        |
| spectrum tree                 | [58]      | SpT          | syntax              | directed vertex-walks of length $q$ ( $q$ -grams) of the syntax tree (see Figure 1)                                                                                    |
| k-band shortest path spectrum | [29]      | kBSPS        | dependency          | vertex-walks of size in the range $[q_{\min}, q_{\max}]$ along the $k$ -band shortest path between the entity pair in the dependency tree                              |
| cosine similarity             | [22]      | cosine       | dependency          | shortest path between the entity pair of the dependency tree                                                                                                           |
| edit distance                 | [22]      | edit         | dependency          | shortest path between the entity pair of the dependency tree                                                                                                           |
| all-paths graph               | [17]      | APG          | shallow, dependency | full dependency graph with POS tags, full word sequence as graph with POS tags, all edges are weighted, higher weights along the shortest path in the dependency graph |

Legend: shallow – shallow linguistic information, such as lemma, stem, POS-tag, usually in conjunction with bag-of-words or token sequence representation; syntax – syntax tree parses; dependency – dependency tree or graph parses; lexical – gazetteers of clue words, e.g. for interactions.
