# Supplementary material for: A Comprehensive Benchmark of Kernel Methods to Extract Protein–Protein Interactions from Literature
Source: PubMed Central journal article supplement (PMC2895635; doi:10.1371/journal.pcbi.1000837), 2010-07-01
Supplement: pcbi.1000837.s003.pdf [file pcbi.1000837.s003.pdf]

**Table S3.** Overview of the usability of the different kernels

| Name   | Availability                                                                                                                                                        | Learning software | Documentation       |
|--------|---------------------------------------------------------------------------------------------------------------------------------------------------------------------|-------------------|---------------------|
| SL     | <a href="http://tcc.itc.it/research/textec/tools-resources/jsre/user-guide-1.1.html">http://tcc.itc.it/research/textec/tools-resources/jsre/user-guide-1.1.html</a> | libSVM 2.80       | homepage and readme |
| ST     | <a href="http://dit.unitn.it/~moschitt/Tree-Kernel.htm">http://dit.unitn.it/~moschitt/Tree-Kernel.htm</a>                                                           | SVM-light-TK 1.5  | homepage            |
| SST    | <a href="http://dit.unitn.it/~moschitt/Tree-Kernel.htm">http://dit.unitn.it/~moschitt/Tree-Kernel.htm</a>                                                           | SVM-light-TK 1.5  | homepage            |
| PT     | on request                                                                                                                                                          | SVM-light-TK 1.5  | homepage            |
| SpT    | published in the online appendix of this paper; implemented by [29]                                                                                                 | SVM-Light 6.02    | homepage            |
| kBSPS  | published in the online appendix of this paper; implemented by [29]                                                                                                 | SVM-Light 6.02    | homepage            |
| cosine | on request                                                                                                                                                          | SVM-Light 6.01    | readme file         |
| edit   | on request                                                                                                                                                          | SVM-Light 6.01    | readme file         |
| APG    | <a href="http://mars.cs.utu.fi/PPICorpora/GraphKernel.html">http://mars.cs.utu.fi/PPICorpora/GraphKernel.html</a>                                                   | sparse RLS        | readme file         |

All tools are command-line-based. Solely APG uses the uniform XML training format from [37], therefore for all other tools the input files have to be appropriately converted.
