# Supplementary material for: A Comprehensive Benchmark of Kernel Methods to Extract Protein–Protein Interactions from Literature
Source: PubMed Central journal article supplement (PMC2895635; doi:10.1371/journal.pcbi.1000837), 2010-07-01
Supplement: pcbi.1000837.s004.pdf [file pcbi.1000837.s004.pdf]

**Table S4.** Overview of our parameter selection strategy

| Kernel          | Parameters                                         | Range                                                                           | Default                         | Average best                                               | Remark                                                                                                                                                        |
|-----------------|----------------------------------------------------|---------------------------------------------------------------------------------|---------------------------------|------------------------------------------------------------|---------------------------------------------------------------------------------------------------------------------------------------------------------------|
| SL              |                                                    |                                                                                 |                                 |                                                            | the implementation disregards the parameter setting, always runs with the default                                                                             |
| ST<br>SST<br>PT | $c; j; \lambda; \mu$                               | [1,16,64,128];<br>[0.5,1,2]; [0.2,0.4,0.8];<br>[0.2,0.4]                        | 0; 1; 0.4; 0.4                  | 1; 2; 0.4; 0.4<br>1; 2; 0.4; 0.4<br>16; 2; 0.4; 0.4        | the default $c = 0$ yields often 0 F-score.<br>In [29] the experiments with $c = 2^i$ ,<br>$i = -6, \dots, -1$ yielded inferior results                       |
| SpT             | $c; j; q$                                          | $2^i, i = -6, \dots, 6$ ;<br>[0.5,1,2]; [2]                                     | *; 1; 10                        | CV: default; 2; 2<br>CL: 64; 1; 2                          | *: the default $c$ is the reciprocal of the average norm of training examples; $q$ is the length of v-walks, its default is not reasonable for PPI extraction |
| kBSPS           | $L; E; D; l; e; d$ ;<br>$q_{\min}; q_{\max}; k; j$ | [0]; [0]; [0,-1]; [1,3,6];<br>[1,3,6]; [1,3,6]; [1,2];<br>[2,3]; [0,1]; [1,2]   | 0; 0; -1; 1; 6; 6<br>2; 2; 0; 2 | CV: $D=0, d=3$ ,<br>all others default;<br>CC, CL: default | $c$ was set to the default as for SpT                                                                                                                         |
| cosine<br>edit  | $c$                                                | [0,1,10,100]                                                                    | 0                               | CV: 10<br>CC, CL: 100                                      | Due to the modest results obtained, we did not perform more comprehensive optimization                                                                        |
| APG             | $c; svnum; to-ken; vector$                         | [0.25;0.5;1;2];<br>[500,2000];<br>[split,Charniak];<br>[linearized, normalized] |                                 | CV/CL/CC:<br>0.25/1/1;<br>2000/2000/2000;<br>s/c/s; n/n/1  | APG comes with no default;<br>svnum = number of support vectors<br>for threshold specification we used the script provided with the implementation            |
| APG<br>(SVM)    | $c; j$                                             | $2^i, i = -10, \dots, 10$ ;<br>[1,2]                                            |                                 | CV: 1;2                                                    | APG trained with SVMlight, other parameters as with standard APG                                                                                              |
