# Supplementary material for: A Comprehensive Benchmark of Kernel Methods to Extract Protein–Protein Interactions from Literature
Source: PubMed Central journal article supplement (PMC2895635; doi:10.1371/journal.pcbi.1000837), 2010-07-01
Supplement: pcbi.1000837.s005.pdf [file pcbi.1000837.s005.pdf]

Table S5. Cross-corpus results

| Kernel | Training corpus | AIMed       |             |             |             | BioInfer    |             |             |             | HPRD50      |             |             |             | IEPA        |             |             |             | LLL         |             |             |             |
|--------|-----------------|-------------|-------------|-------------|-------------|-------------|-------------|-------------|-------------|-------------|-------------|-------------|-------------|-------------|-------------|-------------|-------------|-------------|-------------|-------------|-------------|
|        |                 | AUC         | P           | R           | F           | AUC         | P           | R           | F           | AUC         | P           | R           | F           | AUC         | P           | R           | F           | AUC         | P           | R           | F           |
| SL     | AIMed           | (83.5)      | (47.5)      | (65.5)      | (54.5)      | <b>73.1</b> | 66.8        | 29.2        | 40.6        | 72.9        | 61.7        | 56.4        | 59.0        | 68.8        | 66.3        | 15.8        | 25.5        | 72.6        | 86.4        | 23.2        | 36.5        |
|        | BioInfer        | <b>76.8</b> | 27.2        | 87.1        | <b>41.5</b> | (81.1)      | (55.1)      | (66.5)      | (60.0)      | 74.8        | 51.0        | 78.5        | 61.8        | 76.6        | 63.3        | 64.8        | 64.0        | 80.5        | 71.5        | 78.0        | 74.6        |
|        | HPRD50          | 69.4        | 29.8        | 53.2        | 38.2        | 67.9        | 47.7        | 34.3        | 39.9        | (80.0)      | (64.4)      | (67.0)      | (64.2)      | 69.5        | 64.0        | 45.7        | 53.3        | 74.2        | 70.6        | 54.3        | 61.4        |
|        | IEPA            | 65.8        | 25.9        | 46.0        | 33.1        | <b>72.7</b> | 55.0        | 36.9        | 44.2        | 71.4        | 60.1        | 56.4        | 58.2        | (81.1)      | (69.5)      | (71.2)      | (69.3)      | 76.3        | 80.2        | 56.7        | 66.4        |
|        | LLL             | 61.8        | 21.4        | 66.6        | 32.4        | 68.1        | 40.5        | 58.8        | 47.9        | 72.0        | 50.4        | 71.2        | 59.0        | 72.5        | 52.8        | 77.0        | 62.6        | (81.2)      | (69.0)      | (85.3)      | (74.5)      |
| ST     | AIMed           | (68.9)      | (40.3)      | (25.5)      | (30.9)      | 60.8        | 49.0        | 13.7        | 21.4        | 59.9        | 45.0        | 46.6        | 45.8        | 61.8        | 69.4        | 22.4        | 33.9        | 48.0        | 78.6        | 6.7         | 12.4        |
|        | BioInfer        | 63.7        | 22.5        | 65.8        | 33.5        | (74.2)      | (46.8)      | (60.0)      | (52.2)      | 55.3        | 41.9        | 23.9        | 30.5        | 52.5        | 51.5        | 15.2        | 23.5        | 58.0        | 51.2        | 67.1        | 58.1        |
|        | HPRD50          | 59.7        | 23.0        | 49.3        | 31.4        | 59.4        | 40.8        | 36.5        | 38.5        | (63.3)      | (49.7)      | (67.8)      | (54.5)      | 64.5        | 57.8        | 48.7        | 52.8        | 48.9        | 49.3        | 40.9        | 44.7        |
|        | IEPA            | 62.3        | 29.8        | 23.0        | 26.0        | 65.3        | 54.0        | 15.2        | 23.7        | 56.2        | 53.4        | 33.7        | 41.4        | (75.8)      | (59.4)      | (75.6)      | (65.9)      | 68.6        | 73.5        | 30.5        | 43.1        |
|        | LLL             | 60.4        | 23.3        | 55.9        | 32.9        | 64.3        | 38.7        | 38.1        | 38.4        | 58.3        | 43.0        | 71.8        | 53.8        | 69.0        | 47.0        | 89.6        | 61.7        | (69.0)      | (55.9)      | (100)       | (70.3)      |
| SST    | AIMed           | (68.9)      | (42.6)      | (19.4)      | (26.2)      | 65.6        | 67.3        | 7.4         | 13.3        | 60.1        | 56.8        | 15.3        | 24.2        | 60.6        | 50.0        | 0.6         | 1.2         | 60.9        | 90.9        | 6.1         | 11.4        |
|        | BioInfer        | 66.0        | 22.0        | 76.5        | 34.1        | (73.6)      | (47.0)      | (54.3)      | (50.1)      | 60.9        | 46.0        | 31.3        | 37.2        | 59.2        | 56.9        | 27.2        | 36.8        | 67.8        | 60.1        | 70.7        | 65.0        |
|        | HPRD50          | 59.9        | 22.2        | 54.9        | 31.6        | 55.2        | 40.1        | 36.2        | 38.0        | (62.2)      | (48.1)      | (63.8)      | (52.2)      | 65.8        | 52.6        | 62.7        | 57.2        | 56.2        | 58.3        | 42.7        | 49.3        |
|        | IEPA            | 63.3        | 27.7        | 39.8        | 32.7        | 60.8        | 47.2        | 21.9        | 29.9        | 63.3        | 47.1        | 60.7        | 53.1        | (72.4)      | (54.8)      | (76.9)      | (63.4)      | 73.4        | 74.3        | 45.7        | 56.6        |
|        | LLL             | 60.9        | 17.1        | <b>100.</b> | 29.3        | 65.1        | 26.2        | <b>100.</b> | 41.5        | 58.5        | 37.6        | <b>100.</b> | 54.7        | 65.6        | 41.0        | <b>100.</b> | 58.2        | (63.8)      | (55.9)      | (100)       | (70.3)      |
| PT     | AIMed           | (68.5)      | (39.2)      | (31.9)      | (34.6)      | 58.4        | 47.8        | 10.9        | 17.8        | 66.2        | 56.2        | 41.7        | 47.9        | 66.1        | 67.5        | 15.5        | 25.2        | 55.2        | <b>92.3</b> | 7.3         | 13.6        |
|        | BioInfer        | 65.9        | 23.0        | 69.5        | 34.6        | (73.8)      | (45.3)      | (58.1)      | (50.5)      | 59.8        | 44.1        | 34.4        | 38.6        | 61.5        | 58.5        | 16.4        | 25.6        | 59.1        | 52.8        | 70.1        | 60.2        |
|        | HPRD50          | 64.7        | 29.4        | 45.6        | 35.8        | 61.9        | 43.6        | 22.5        | 29.7        | (65.2)      | (54.9)      | (56.7)      | (52.4)      | 69.0        | 60.1        | 54.3        | 57.1        | 54.7        | 51.9        | 33.5        | 40.7        |
|        | IEPA            | 63.8        | 31.6        | 25.8        | 28.4        | 65.6        | 50.8        | 12.3        | 19.8        | 62.3        | 50.4        | 37.4        | 43.0        | (73.1)      | (63.1)      | (66.3)      | (63.8)      | 69.8        | 75.8        | 30.5        | 43.5        |
|        | LLL             | 59.4        | 18.6        | 76.6        | 30.0        | 63.0        | 32.1        | 66.8        | 43.3        | 59.9        | 43.1        | 77.9        | 55.5        | 59.0        | 42.8        | 77.6        | 55.2        | (66.7)      | (56.2)      | (97.3)      | (69.3)      |
| SpT    | AIMed           | (66.1)      | (33.0)      | (25.5)      | (27.3)      | 69.5        | 48.4        | 16.3        | 24.3        | 60.0        | 47.1        | 39.9        | 43.2        | 67.9        | 59.7        | 11.0        | 18.6        | 57.0        | 72.7        | 9.8         | 17.2        |
|        | BioInfer        | 65.3        | 22.3        | 77.8        | 34.7        | (74.1)      | (44.0)      | (68.2)      | (53.4)      | 57.2        | 41.4        | 67.5        | 51.3        | 69.9        | 61.2        | 52.2        | 56.4        | 55.7        | 54.2        | 62.8        | 58.2        |
|        | HPRD50          | 62.0        | 22.6        | 57.8        | 32.5        | 65.1        | 39.7        | 40.4        | 40.0        | (65.7)      | (49.3)      | (71.7)      | (56.4)      | 69.2        | 57.8        | 53.1        | 55.4        | 57.0        | 58.3        | 42.7        | 49.3        |
|        | IEPA            | 64.2        | 28.5        | 38.3        | 32.7        | 72.1        | 52.6        | 22.1        | 31.1        | 60.7        | 45.3        | 53.4        | 49.0        | (75.9)      | (54.5)      | (81.8)      | (64.7)      | 72.1        | 73.2        | 43.3        | 54.4        |
|        | LLL             | 64.5        | 19.2        | 90.7        | 31.7        | 70.9        | 35.1        | 88.4        | <b>50.3</b> | 57.3        | 37.6        | 100.        | 54.7        | 72.7        | 42.3        | 97.3        | 59.0        | (50.0)      | (55.9)      | (100)       | (70.3)      |
| kBSPPS | AIMed           | (75.1)      | (50.1)      | (41.4)      | (44.6)      | 69.9        | 71.6        | 15.0        | 24.8        | 76.8        | 77.5        | 38.0        | 51.0        | 73.6        | 66.7        | 5.4         | 9.9         | 75.1        | 85.7        | 7.3         | 13.5        |
|        | BioInfer        | 71.8        | 29.1        | 65.6        | 40.3        | (75.2)      | (49.9)      | (61.8)      | (55.1)      | <b>77.7</b> | 61.0        | 81.6        | <b>69.8</b> | <b>81.5</b> | 67.4        | 78.2        | <b>72.4</b> | 85.1        | 76.8        | 84.8        | <b>80.6</b> |
|        | HPRD50          | 66.4        | 24.9        | 64.1        | 35.9        | 66.1        | 38.3        | 53.6        | 44.7        | (79.3)      | (62.2)      | (87.1)      | (71.0)      | 69.0        | 55.3        | 56.1        | 55.7        | 71.2        | 65.1        | 59.2        | 62.0        |
|        | IEPA            | 67.0        | 23.1        | 77.2        | 35.6        | 71.4        | 40.1        | 70.7        | <b>51.1</b> | 74.9        | 52.1        | 84.1        | 64.3        | (83.2)      | (58.8)      | (89.7)      | (70.5)      | 80.7        | 64.5        | <b>92.1</b> | 75.9        |
|        | LLL             | 60.1        | 22.4        | 75.3        | 34.5        | 67.7        | 37.0        | 71.8        | 48.8        | 72.3        | 49.8        | 84.1        | 62.6        | 74.6        | 53.0        | 89.6        | 66.6        | (84.3)      | (69.3)      | (93.2)      | (78.1)      |
| cosine | AIMed           | (70.5)      | (43.6)      | (39.4)      | (40.9)      | 61.1        | 45.2        | 22.8        | 30.3        | 68.1        | 71.4        | 39.9        | 51.2        | 51.2        | 50.0        | 14.9        | 23.0        | 56.9        | 77.3        | 20.7        | 32.7        |
|        | BioInfer        | 65.4        | 26.3        | 59.7        | 36.5        | (66.1)      | (44.8)      | (44.0)      | (44.1)      | 70.8        | 56.6        | 71.2        | 63.0        | 57.1        | 47.9        | 40.0        | 43.6        | 67.3        | 71.3        | 59.2        | 64.7        |
|        | HPRD50          | 63.2        | 24.4        | 49.8        | 32.7        | 60.2        | 37.9        | 37.4        | 37.7        | (74.8)      | (59.0)      | (67.2)      | (61.2)      | 55.8        | 46.2        | 44.8        | 45.5        | 63.3        | 75.3        | 40.9        | 53.0        |
|        | IEPA            | 57.2        | 20.6        | 55.8        | 30.1        | 61.5        | 34.5        | 51.9        | 41.4        | 59.9        | 44.4        | 67.5        | 53.5        | (75.5)      | (61.3)      | (68.4)      | (64.1)      | 66.4        | 60.9        | 73.2        | 66.5        |
|        | LLL             | 57.1        | 19.9        | 63.2        | 30.2        | 61.4        | 33.4        | 58.8        | 42.6        | 66.6        | 45.9        | 71.8        | 56.0        | 70.6        | 53.8        | 78.5        | 63.8        | (75.2)      | (70.2)      | (81.7)      | (73.8)      |
| edit   | AIMed           | (75.2)      | (68.8)      | (27.7)      | (39.0)      | 67.5        | <b>86.4</b> | 8.8         | 15.9        | <b>78.1</b> | <b>87.0</b> | 24.5        | 38.3        | 71.1        | <b>92.9</b> | 3.9         | 7.5         | 73.2        | 75.0        | 1.8         | 3.6         |
|        | BioInfer        | 66.9        | 30.0        | 58.4        | 39.6        | (67.4)      | (50.4)      | (39.2)      | (43.8)      | 72.7        | 59.4        | 65.6        | 62.4        | 69.3        | 61.1        | 55.8        | 58.4        | 66.9        | 69.0        | 54.3        | 60.8        |
|        | HPRD50          | 68.0        | <b>38.7</b> | 40.1        | 39.4        | 65.4        | 57.4        | 21.9        | 31.7        | (79.2)      | (71.3)      | (45.2)      | (53.3)      | 70.9        | 79.8        | 28.4        | 41.9        | 77.9        | 89.8        | 32.3        | 47.5        |
|        | IEPA            | 66.4        | 32.4        | 35.8        | 34.0        | 67.9        | 60.8        | 28.2        | 38.5        | 75.6        | 67.3        | 42.9        | 52.4        | (80.2)      | (77.2)      | (60.2)      | (67.1)      | <b>88.0</b> | 90.1        | 50.0        | 64.3        |
|        | LLL             | 62.8        | 19.7        | 85.5        | 32.0        | 65.6        | 31.1        | 79.3        | 44.7        | 76.1        | 45.9        | 93.3        | 61.5        | 75.2        | 46.7        | 97.0        | 63.1        | (87.5)      | (68.0)      | (98.0)      | (78.4)      |
| APG    | AIMed           | (84.6)      | (59.9)      | (53.6)      | (56.2)      | 66.0        | 56.5        | 14.0        | 22.5        | <b>77.7</b> | 74.1        | 52.8        | 61.6        | 73.1        | 69.2        | 13.4        | 22.5        | 82.7        | 88.9        | 9.8         | 17.6        |
|        | BioInfer        | 71.2        | 24.7        | 81.8        | 37.9        | (81.5)      | (60.2)      | (61.3)      | (60.7)      | 76.0        | 49.3        | 84.0        | 62.1        | 81.4        | 61.7        | 82.7        | 70.7        | 82.0        | 69.0        | 85.4        | 76.3        |
|        | HPRD50          | 72.3        | 20.9        | 93.7        | 34.2        | 58.2        | 28.5        | 71.7        | 40.7        | (80.9)      | (68.2)      | (69.8)      | (67.8)      | 71.2        | 45.2        | 93.1        | 60.9        | 56.9        | 51.0        | 79.3        | 62.1        |
|        | IEPA            | 70.1        | 30.0        | 41.2        | 34.7        | <b>72.7</b> | 60.6        | 26.6        | 37.0        | 75.5        | 65.4        | 62.6        | 63.9        | (83.9)      | (66.6)      | (82.6)      | (73.1)      | 85.8        | 84.2        | 48.8        | 61.8        |
|        | LLL             | 61.1        | 21.9        | 59.2        | 32.0        | 65.7        | 35.2        | 65.5        | 45.8        | 73.5        | 54.8        | 74.2        | 63.0        | 72.9        | 53.7        | 76.1        | 63.0        | (83.5)      | (71.3)      | (91.0)      | (78.1)      |

Classifiers are trained on one corpus and tested on the other four corpora. Rows correspond to the training corpora and columns to test corpora. In parentheses, we show the cross-validated results for reference. Bold typeface indicates our best overall result for a corpus (differences under 1 base point are ignored).
