# Supplementary material for: A Comprehensive Benchmark of Kernel Methods to Extract Protein–Protein Interactions from Literature
Source: PubMed Central journal article supplement (PMC2895635; doi:10.1371/journal.pcbi.1000837), 2010-07-01
Supplement: pcbi.1000837.s006.pdf [file pcbi.1000837.s006.pdf]

**Table S6.** Ranking of corpora at CC evaluation based on their AUC and F-score values

| Kernel | Training corpus | AUC             |                 |                 |                 |                 |       | F-score         |                 |                 |                 |                 |       |
|--------|-----------------|-----------------|-----------------|-----------------|-----------------|-----------------|-------|-----------------|-----------------|-----------------|-----------------|-----------------|-------|
|        |                 | AIMed           | BioInfer        | HPRD50          | IEPA            | LLL             | rank  | AIMed           | BioInfer        | HPRD50          | IEPA            | LLL             | rank  |
| SL     | AIMed           | –               | <b>73.1</b> [1] | 72.9 [2]        | 68.8 [4]        | 72.6 [4]        | 2.75  | –               | 40.6 [3]        | 59.0 [2.5]      | 25.5 [4]        | 36.5 [4]        | 3.375 |
|        | <b>BioInfer</b> | <b>76.8</b> [1] | –               | 74.8 [1]        | 76.6 [1]        | 80.5 [1]        | 1     | <b>41.5</b> [1] | –               | 61.8 [1]        | 64.0 [1]        | 74.6 [1]        | 1     |
|        | HPRD50          | 69.4 [2]        | 67.9 [4]        | –               | 69.5 [3]        | 74.2 [3]        | 3     | 38.2 [2]        | 39.9 [4]        | –               | 53.3 [3]        | 61.4 [3]        | 3     |
|        | IEPA            | 65.8 [3]        | <b>72.7</b> [2] | 71.4 [4]        | –               | 76.3 [2]        | 2.75  | 33.1 [3]        | 44.2 [2]        | 58.2 [4]        | –               | 66.4 [2]        | 2.75  |
|        | LLL             | 61.8 [4]        | 68.1 [3]        | 72.0 [3]        | 72.5 [2]        | –               | 3     | 32.4 [4]        | 47.9 [1]        | 59.0 [2.5]      | 62.6 [2]        | –               | 2.375 |
| SpT    | AIMed           | –               | 69.5 [3]        | 60.0 [2]        | 67.9 [4]        | 57.0 [2.5]      | 2.875 | –               | 24.3 [4]        | 43.2 [4]        | 18.6 [4]        | 17.2 [4]        | 4     |
|        | BioInfer        | 65.3 [1]        | –               | 57.2 [4]        | 69.9 [2]        | 55.7 [4]        | 2.75  | 34.7 [1]        | –               | 51.3 [2]        | 56.4 [2]        | 58.2 [1]        | 1.5   |
|        | HPRD50          | 62.0 [4]        | 65.1 [4]        | –               | 69.2 [3]        | 57.0 [2.5]      | 3.375 | 32.5 [3]        | 40.0 [2]        | –               | 55.4 [3]        | 49.3 [3]        | 2.75  |
|        | IEPA            | 64.2 [3]        | 72.1 [1]        | 60.7 [1]        | –               | 72.1 [1]        | 1.5   | 32.7 [2]        | 31.1 [3]        | 49.0 [3]        | –               | 54.4 [2]        | 2.5   |
|        | <b>LLL</b>      | 64.5 [2]        | 70.9 [2]        | 57.3 [3]        | 72.7 [1]        | –               | 2     | 31.7 [4]        | <b>50.3</b> [1] | 54.7 [1]        | 59.0 [1]        | –               | 1.75  |
| kBSPS  | AIMed           | –               | 69.9 [2]        | 76.8 [3]        | 73.6 [3]        | 75.1 [3]        | 2.75  | –               | 24.8 [4]        | 51.0 [4]        | 9.9 [4]         | 13.5 [4]        | 4     |
|        | <b>BioInfer</b> | 71.8 [1]        | –               | <b>77.7</b> [2] | <b>81.5</b> [1] | 85.1 [1]        | 1.25  | 40.3 [1]        | –               | <b>69.8</b> [1] | <b>72.4</b> [1] | <b>80.6</b> [1] | 1     |
|        | HPRD50          | 66.4 [3]        | 66.1 [4]        | –               | 69.0 [4]        | 71.2 [4]        | 3.75  | 35.9 [2]        | 44.7 [3]        | –               | 55.7 [3]        | 62.0 [3]        | 2.75  |
|        | IEPA            | 67.0 [2]        | 71.0 [1]        | <b>77.9</b> [1] | –               | 80.7 [2]        | 1.5   | 35.6 [3]        | <b>51.1</b> [1] | 64.3 [2]        | –               | 75.9 [2]        | 2     |
|        | LLL             | 60.1 [4]        | 67.7 [3]        | 72.3 [4]        | 74.6 [2]        | –               | 3.25  | 34.5 [4]        | 48.8 [2]        | 62.6 [3]        | 66.6 [2]        | –               | 2.75  |
| edit   | AIMed           | –               | 67.5 [2]        | <b>78.1</b> [1] | 71.1 [2]        | 73.2 [3]        | 2     | –               | 15.9 [4]        | 38.3 [4]        | 7.5 [4]         | 3.6 [4]         | 4     |
|        | BioInfer        | 66.9 [2]        | –               | 72.7 [4]        | 69.3 [4]        | 66.9 [4]        | 3.5   | 39.6 [1]        | –               | 62.4 [1]        | 58.4 [2]        | 60.8 [2]        | 1.5   |
|        | HPRD50          | 68.0 [1]        | 65.4 [4]        | –               | 70.9 [3]        | 77.9 [2]        | 2.5   | 39.4 [2]        | 31.7 [3]        | –               | 41.9 [3]        | 47.5 [3]        | 2.75  |
|        | <b>IEPA</b>     | 66.4 [3]        | 67.9 [1]        | 75.6 [3]        | –               | <b>88.0</b> [1] | 2     | 34.0 [3]        | 38.5 [2]        | 52.4 [3]        | –               | 64.3 [1]        | 2.25  |
|        | LLL             | 62.8 [4]        | 65.6 [3]        | 76.1 [2]        | 75.2 [1]        | –               | 2.5   | 32.0 [4]        | 44.7 [1]        | 61.5 [2]        | 63.1 [1]        | –               | 2     |
| APG    | AIMed           | –               | 66.0 [2]        | <b>77.7</b> [1] | 73.1 [2]        | 82.7 [2]        | 1.75  | –               | 22.5 [4]        | 61.6 [4]        | 22.5 [4]        | 17.6 [4]        | 4     |
|        | <b>BioInfer</b> | 71.2 [2]        | –               | 76.0 [2]        | <b>81.4</b> [1] | 82.0 [3]        | 2     | 37.9 [1]        | –               | 62.1 [3]        | 70.7 [1]        | 76.3 [1]        | 1.5   |
|        | HPRD50          | 72.3 [1]        | 58.2 [4]        | –               | 71.2 [4]        | 56.9 [4]        | 3.25  | 34.2 [3]        | 40.7 [2]        | –               | 60.9 [3]        | 62.1 [2]        | 2.5   |
|        | IEPA            | 70.1 [3]        | <b>72.7</b> [1] | 75.5 [3]        | –               | 85.8 [1]        | 2     | 34.7 [2]        | 37.0 [3]        | 63.9 [1]        | –               | 61.8 [3]        | 2.25  |
|        | LLL             | 61.1 [4]        | 65.7 [3]        | 73.5 [4]        | 72.9 [3]        | –               | 3.5   | 32.0 [4]        | 45.8 [1]        | 63.0 [2]        | 63.0 [2]        | –               | 2.25  |

In brackets we present the ranking of each training corpus for each kernel, and we also show the average rank of the training corpus over the 4 test corpora. Bold typeface indicates our best overall result for a corpus.
