# Supplementary material for: A Comprehensive Benchmark of Kernel Methods to Extract Protein–Protein Interactions from Literature
Source: PubMed Central journal article supplement (PMC2895635; doi:10.1371/journal.pcbi.1000837), 2010-07-01
Supplement: pcbi.1000837.s008.pdf [file pcbi.1000837.s008.pdf]

**Table S8.** CV results with transductive SVM for kBSPS, edit, cosine kernels

| Kernel | Corpus   | AUC         | P            | R            | F            |
|--------|----------|-------------|--------------|--------------|--------------|
| kBSPS  | AIMed    | 74.8 (-0.3) | 44.0 (-6.1)  | 47.3 (+5.9)  | 45.0 (+0.4)  |
|        | BioInfer | 76.6 (+1.4) | 53.8 (+3.9)  | 60.6 (-1.2)  | 56.7 (+1.6)  |
|        | HPRD50   | 75.8 (-3.5) | 62.9 (+0.7)  | 67.9 (-19.2) | 64.0 (-7.0)  |
|        | IEPA     | 83.0 (-0.2) | 63.9 (+5.1)  | 81.7 (-8.0)  | 71.2 (+0.7)  |
|        | LLL      | 81.1 (-3.2) | 76.9 (+7.6)  | 84.8 (-8.4)  | 79.2 (+1.1)  |
| cosine | AIMed    | 67.3 (-3.2) | 39.0 (-4.6)  | 41.2 (-1.8)  | 39.6 (-1.3)  |
|        | BioInfer | 64.2 (-1.9) | 42.6 (-2.2)  | 45.2 (+1.2)  | 43.5 (-0.7)  |
|        | HPRD50   | 71.1 (-3.7) | 60.3 (+1.3)  | 62.3 (-4.9)  | 60.5 (-0.7)  |
|        | IEPA     | 75.2 (-0.3) | 63.8 (+2.5)  | 65.8 (-2.6)  | 64.1 (+0.0)  |
|        | LLL      | 75.5 (+0.3) | 72.7 (+2.5)  | 66.2 (-15.5) | 67.9 (-5.9)  |
| edit   | AIMed    | 73.4 (-1.8) | 50.9 (-17.9) | 49.8 (+22.1) | 49.8 (+10.0) |
|        | BioInfer | 71.9 (+4.5) | 51.0 (+0.6)  | 52.9 (+13.7) | 51.3 (+7.5)  |
|        | HPRD50   | 71.0 (-8.2) | 62.9 (-8.6)  | 61.4 (+16.2) | 61.0 (+7.7)  |
|        | IEPA     | 75.9 (-4.3) | 67.4 (-9.8)  | 68.7 (+8.5)  | 67.4 (-0.3)  |
|        | LLL      | 82.4 (-5.1) | 81.3 (+13.7) | 73.9 (-24.1) | 75.1 (-3.3)  |

Average best results are shown. In parenthesis we show the difference compared to the results of standard SVM (Table 2).
