# Supplementary material for: A Comprehensive Benchmark of Kernel Methods to Extract Protein–Protein Interactions from Literature
Source: PLoS Comput Biol. 2010 Jul 1;6(7):e1000837. doi: 10.1371/journal.pcbi.1000837 (PMC2895635; doi:10.1371/journal.pcbi.1000837)
Supplement: Table S2 — Other kernels considered. Overview of other kernel based methods in the literature that we did not tested in the paper. (0.06 MB PDF) [file pcbi.1000837.s002.pdf]

**Table S2.** Other kernels considered

| Kernel(s)                                   | Reference | Information source           | Reason why not evaluated                                                                                                                                                                                             |
|---------------------------------------------|-----------|------------------------------|----------------------------------------------------------------------------------------------------------------------------------------------------------------------------------------------------------------------|
| predicate, walk, dependency, hybrid kernels | [25]      | shallow, lexical, dependency | Not available. The link to the source is broken and the authors did not reply to our enquiries.                                                                                                                      |
| rich-feature-vector-based kernel            | [26]      | shallow, dependency          | Not available. The source code will be published later as a part of a package (S. van Landeghem, personal communication).                                                                                            |
| kernel based on even more features          | [67]      | lexical, dependency          | Only the feature selection is published at <a href="http://www.cs.utoronto.ca/~juris/data/BI09/">http://www.cs.utoronto.ca/~juris/data/BI09/</a>                                                                     |
| subtree on dependency trees                 | [21]      | dependency                   | Not available.                                                                                                                                                                                                       |
| contiguous and sparse subtree kernels       | [32]      | dependency                   | Not available.                                                                                                                                                                                                       |
| general sparse subsequence kernel           | [19]      | shallow                      | Similar to [23], but shows lower performance.                                                                                                                                                                        |
| convolution dependency path kernel          | [31]      | dependency                   | Not available.                                                                                                                                                                                                       |
| hybrid kernel                               | [27]      | shallow, syntax, dependency  | Not available. The authors plan to publish their approach soon (M. Miwa, personal communication) <a href="http://www-tsujii.is.s.u-tokyo.ac.jp/~satre/akane/">http://www-tsujii.is.s.u-tokyo.ac.jp/~satre/akane/</a> |
| local alignment kernel                      | [24]      | shallow                      | Not available. May be published in the future (S. Katrengo, pers. communication)                                                                                                                                     |

For the description of information sources, see Table S1.
