# Supplementary material for: A Comprehensive Benchmark of Kernel Methods to Extract Protein–Protein Interactions from Literature
Source: PLoS Comput Biol. 2010 Jul 1;6(7):e1000837. doi: 10.1371/journal.pcbi.1000837 (PMC2895635; doi:10.1371/journal.pcbi.1000837)
Supplement: Table S9 — Average runtime of training and test processes, and runtime estimates on entire Medline. Average runtime of training and test processes per corpus measured over all cross-validation experiments for each kernel (not including the parsing time at pre-processing), and rough runtime estimates on the entire Medline. (0.06 MB PDF) [file pcbi.1000837.s009.pdf]

**Table S9.** Average runtime of training and test processes per corpus measured over all cross-validation experiments for each kernel (not including the parsing time at pre-processing), and rough runtime estimates on the entire Medline

| Kernel | Corpora (sec) |       |          |       |        |      |       |      |       |      | average                      | Medline (days)               |                        |                            |
|--------|---------------|-------|----------|-------|--------|------|-------|------|-------|------|------------------------------|------------------------------|------------------------|----------------------------|
|        | AIMed         |       | BioInfer |       | HPRD50 |      | IEPA  |      | LLL   |      | test time<br>per<br>sentence | estimated<br>parsing<br>time | estimated<br>test time | estimated<br>total<br>time |
|        | train         | test  | train    | test  | train  | test | train | test | train | test |                              |                              |                        |                            |
| SL     | 66.4          | 10.8  | 142.5    | 24.0  | 4.1    | 1.2  | 9.3   | 1.8  | 3.5   | 1.1  | 0.107                        | 6                            | 141                    | 147                        |
| ST     | 142.0         | 18.0  | 459.9    | 60.3  | 0.5    | 0.1  | 2.2   | 0.3  | 0.9   | ~0.0 | 0.130                        | 1431                         | 172                    | 1603                       |
| SST    | 138.1         | 19.1  | 479.3    | 67.8  | 0.5    | 0.1  | 2.2   | 0.4  | 0.9   | ~0.0 | 0.146                        | 1431                         | 192                    | 1623                       |
| PT     | 1462.7        | 188.5 | 6088.7   | 832.6 | 8.5    | 1.3  | 39.7  | 7.0  | 13.5  | 1.0  | 1.779                        | 1431                         | 2342                   | 3773                       |
| SpT    | 232.4         | 44.5  | 330.6    | 79.8  | 0.4    | 0.1  | 1.8   | 0.6  | 0.3   | 0.1  | 0.197                        | 1431                         | 259                    | 1609                       |
| kBSPS  | 5.4           | 0.4   | 17.8     | 1.5   | ~0.0   | ~0.0 | 0.2   | ~0.0 | ~0.0  | ~0.0 | 0.003                        | 180                          | 4                      | 185                        |
| cosine | 185.1         | 9.6   | 1853.6   | 31.7  | 1.3    | 0.1  | 4.0   | 0.3  | 0.9   | ~0.0 | 0.070                        | 180                          | 92                     | 272                        |
| edit   | 180.9         | 13.0  | 1073.1   | 27.7  | 0.8    | 0.1  | 3.0   | 0.5  | 0.7   | 0.1  | 0.070                        | 180                          | 92                     | 272                        |
| APG    | 4517.4        | 3.7   | 8264.3   | 6.2   | 71.4   | 0.4  | 275.6 | 0.8  | 74.7  | 0.4  | 0.034                        | 180                          | 45                     | 226                        |
| dict   | 223.9         |       | 465.1    |       | 11.4   |      | 33.6  |      | 16.6  |      |                              |                              |                        |                            |
| lin    | 203.1         |       | 404.8    |       | 10.6   |      | 30.7  |      | 13.9  |      |                              |                              |                        |                            |
| norm   | 50.7          |       | 87.1     |       | 3.6    |      | 8.1   |      | 3.6   |      |                              |                              |                        |                            |
| train  | 4039.7        |       | 7307.4   |       | 45.9   |      | 203.2 |      | 40.6  |      |                              |                              |                        |                            |

Estimates on Medline are based on the followings: (1) Medline contains 10.35M articles with abstract and 7.65M with only title, on average 10.25 sentences per abstract; (2) parsing runtimes are estimated based on [38, Table 2] (syntax and dependency parsers) and [72, Table 2] (time ratio of shallow and various deep parsers). Numbers are given in seconds for benchmark corpora and days for Medline.
